# Supplementary material for: Targeted delivery of HES5-siRNA with novel polypeptide-modified nanoparticles for hepatocellular carcinoma therapy
Source: Royal Society of Chemistry journal article supplement (doi:10.1039/c7ra12461a), 2018-01-01
Supplement: c7ra12461a1.pdf [file c7ra12461a1.pdf]

## Supporting Information

Targeted delivery of HES5-siRNA with novel polypeptide-modified nanoparticles for hepatocellular carcinoma therapy

Yu Xia, Changbing Wang, Tiantian Xu, Yinghua Li, Min Guo, Zhengfang Lin, Mingqi Zhao and Bing Zhu\*

Virus laboratory, Guangzhou Institute of Pediatrics, Guangzhou Women and Children's Medical Center, Guangzhou Medical University, Guangzhou 510120, China

\* Address for Correspondence: Bing Zhu

Guangzhou Women and children's Medical center, No 318 Renminzhong road, Yuexiu District, Guangzhou, Guangdong, 510120, P. R. China

Tel +86 20 8133 0740

Fax +86 20 8188 5978

Email: [zhubing2017@hotmail.com](mailto:zhubing2017@hotmail.com)

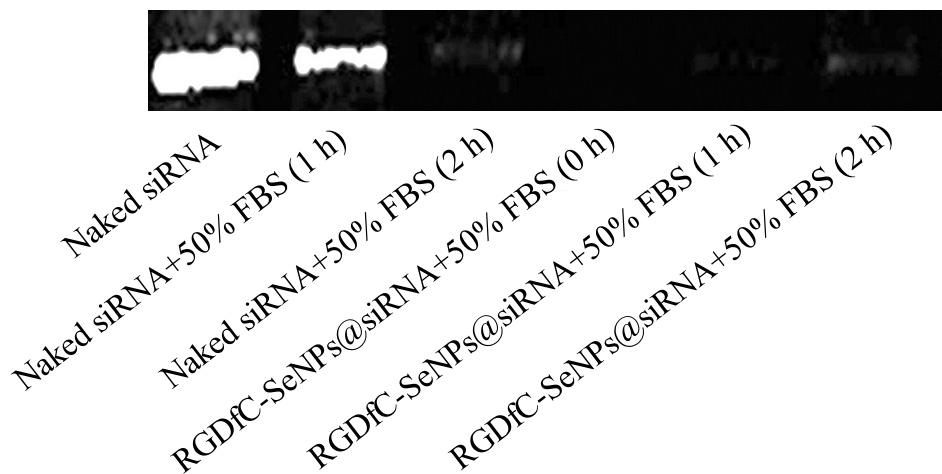

**Fig. S1** Agarose gel electrophoretogram showing siRNA protection by RGDfC-SeNPs for different time of incubation compared to siRNA exposed to 50% serum. Naked siRNA not exposed to serum was used as control.

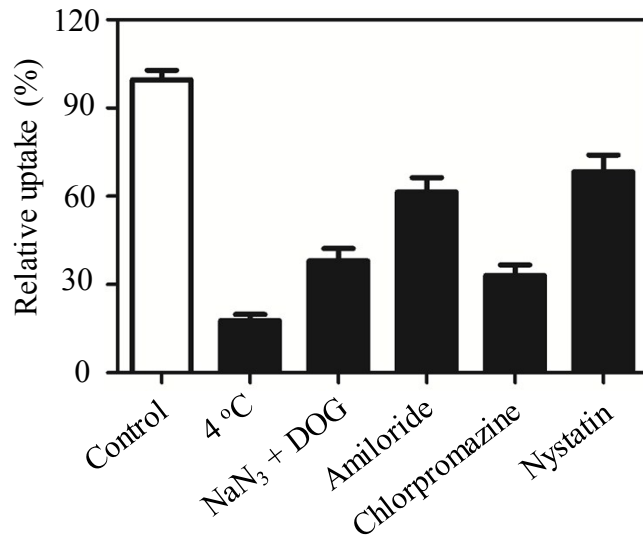

**Fig. S2** Effect of temperature or endocytic inhibitors on the internalizations of RGDfC-SeNPs@siRNA nanoparticles.

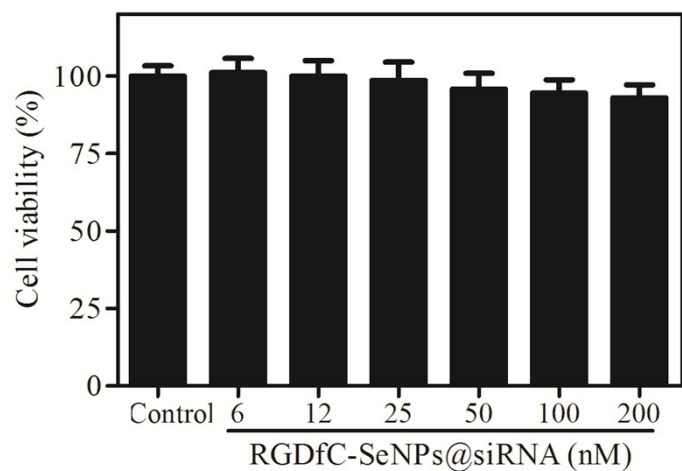

**Fig. S3** The viabilities of Lo2 cell treated with RGDfC-SeNPs@siRNA after 48 h incubation.

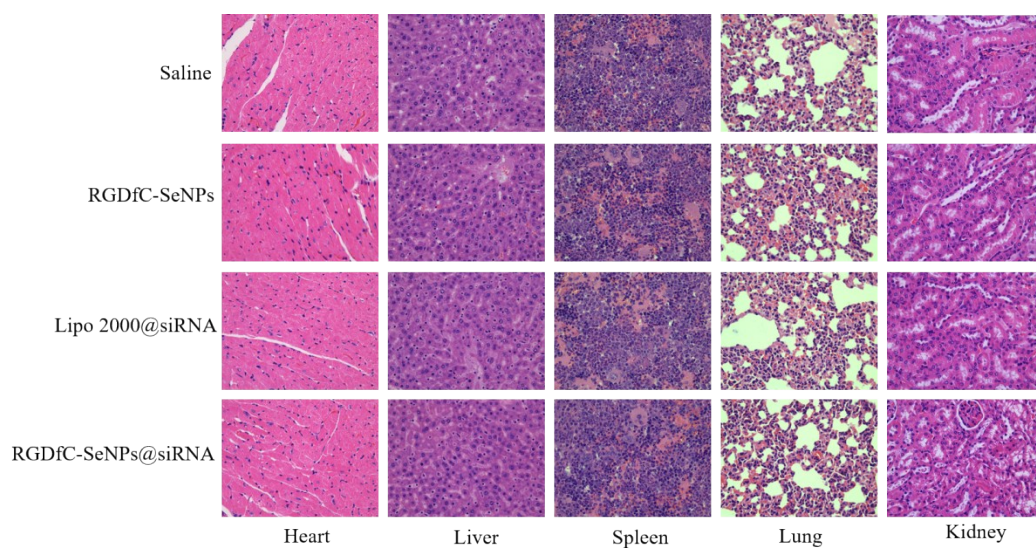

**Fig. S4** H&E analyses of heart, liver, spleen, lung and kidney after treatment with saline, RGDfC-SeNPs, lipofectamine 2000@siRNA or RGDfC-SeNPs@siRNA.
